# Supplementary material for: APC loss affects DNA damage repair causing doxorubicin resistance in breast cancer cells
Source: PubMed Central journal article supplement — Neoplasia. 2019 Nov 20;21(12):1143–50. doi: 10.1016/j.neo.2019.09.002 (PMC6872841; doi:10.1016/j.neo.2019.09.002), 2019-11-20

A

B

C

HER2

ER

PR

Actin

Actin

Actin

*Apc*<sup>+/+</sup>

*Apc*<sup>Min/+</sup>

E0771

MMTV-neu

*Apc*<sup>+/+</sup>

*Apc*<sup>Min/+</sup>

E0771

MCF7

*Apc*<sup>+/+</sup>

*Apc*<sup>Min/+</sup>

E0771

Uterus

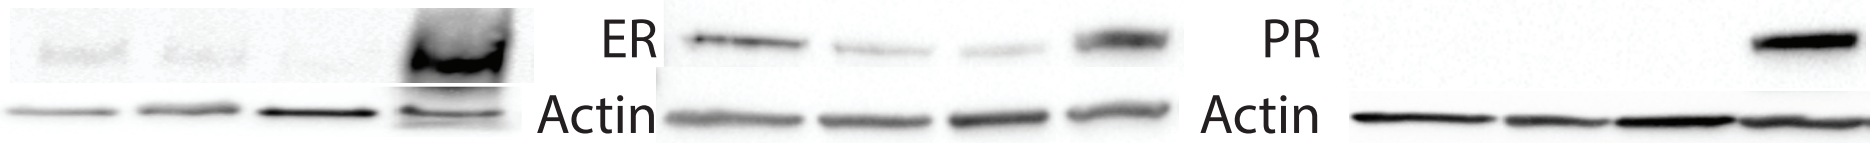

Supplement: mmc1.pdf [file mmc1.pdf]
