# Supplementary figures and images for: APC loss affects DNA damage repair causing doxorubicin resistance in breast cancer cells
Source: PubMed Central journal article supplement — Neoplasia. 2019 Nov 20;21(12):1143–50. doi: 10.1016/j.neo.2019.09.002 (PMC6872841; doi:10.1016/j.neo.2019.09.002), 2019-11-20

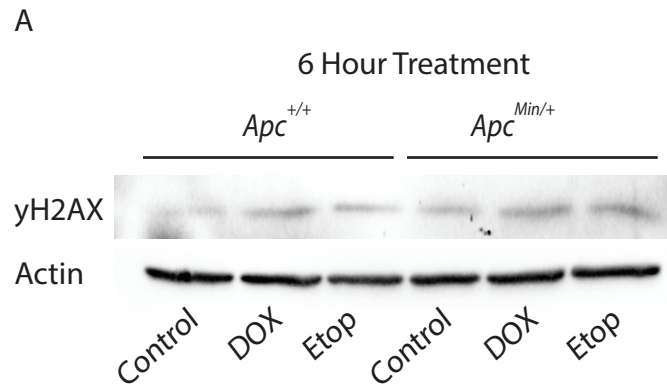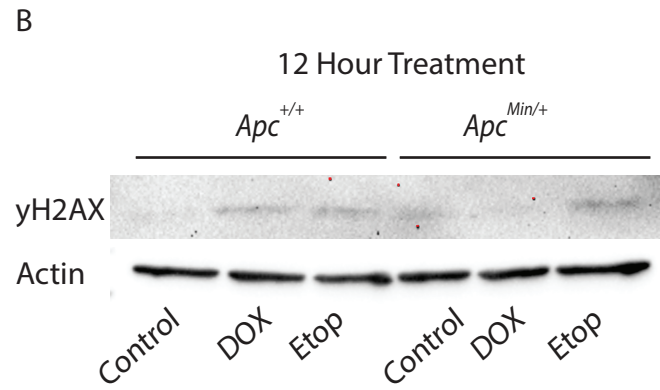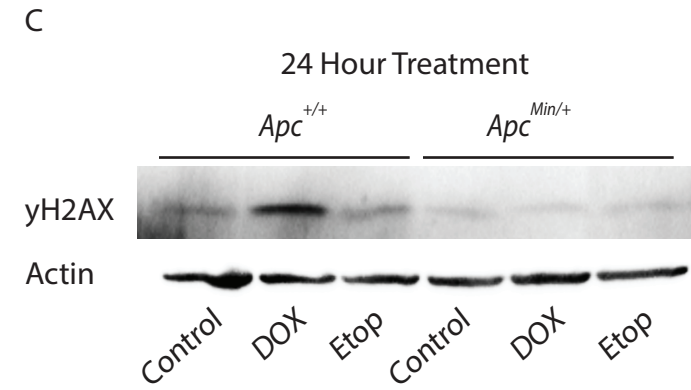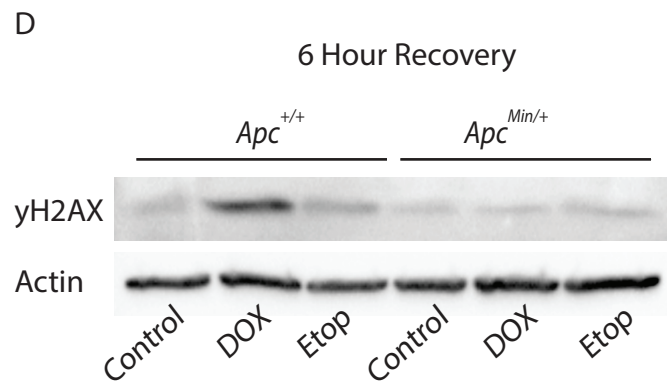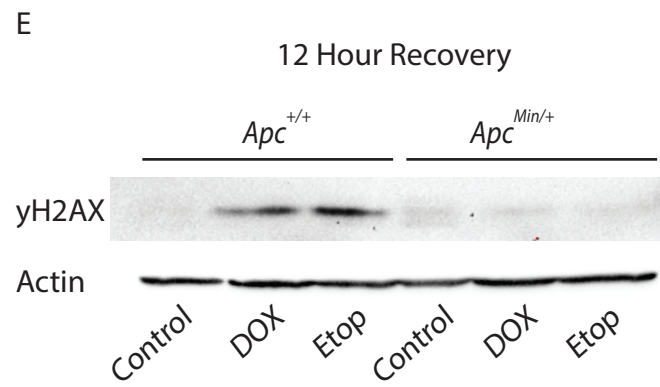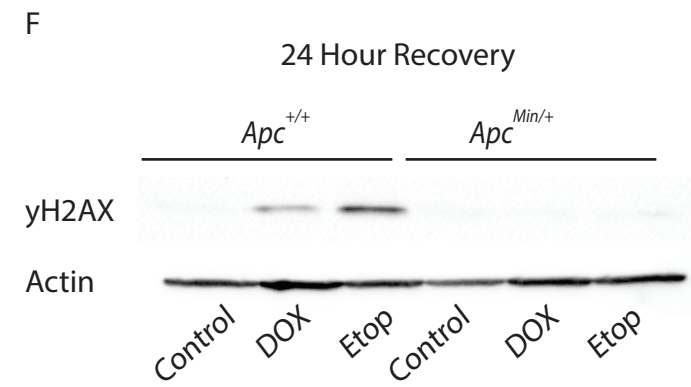

Supplement: mmc2.pdf [file mmc2.pdf]

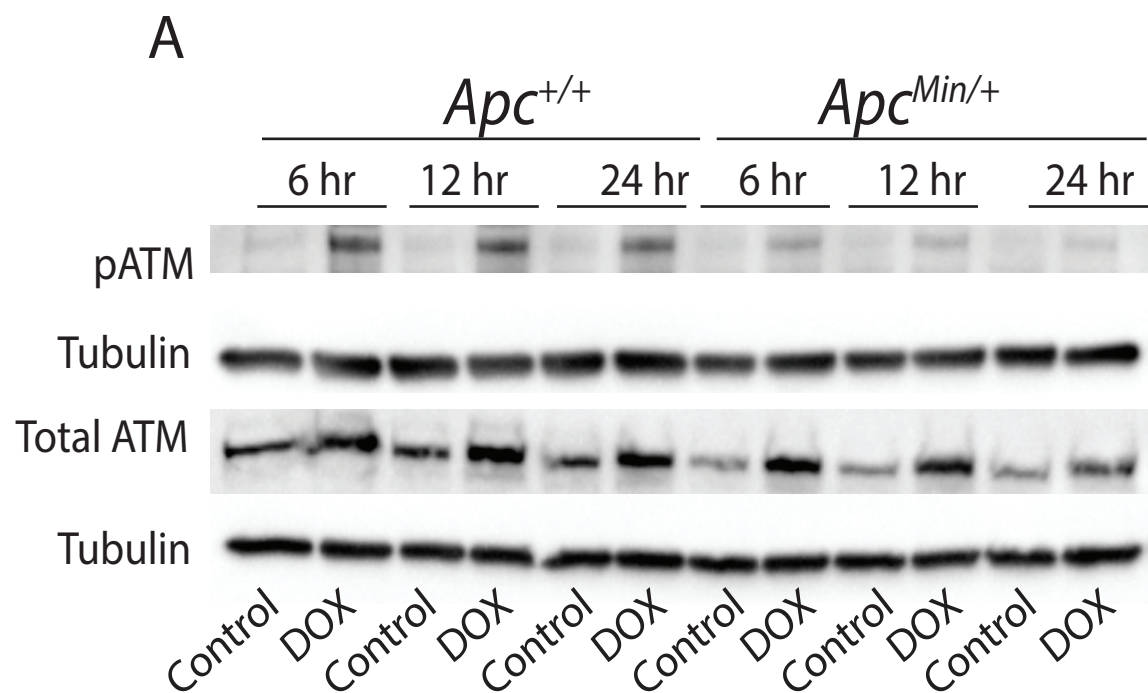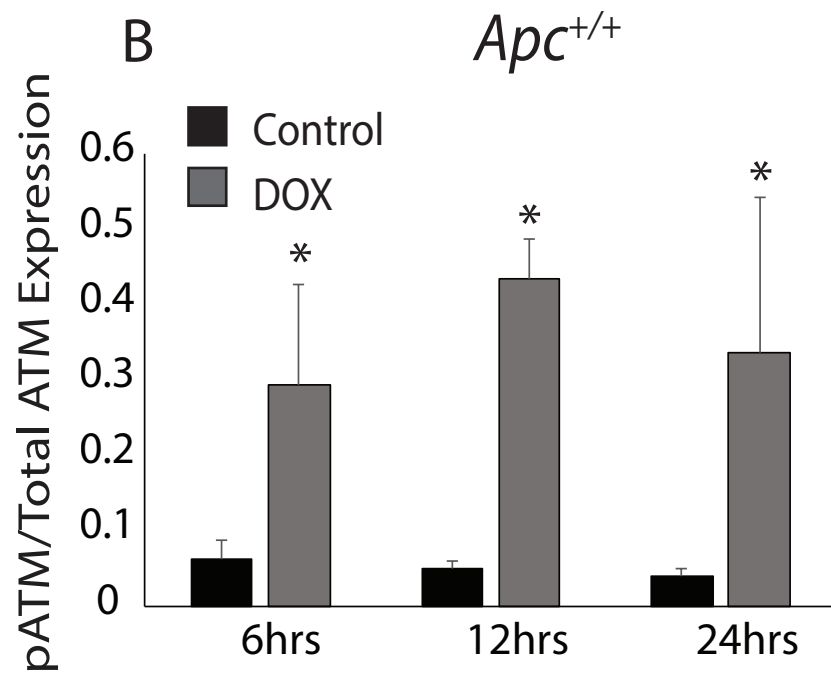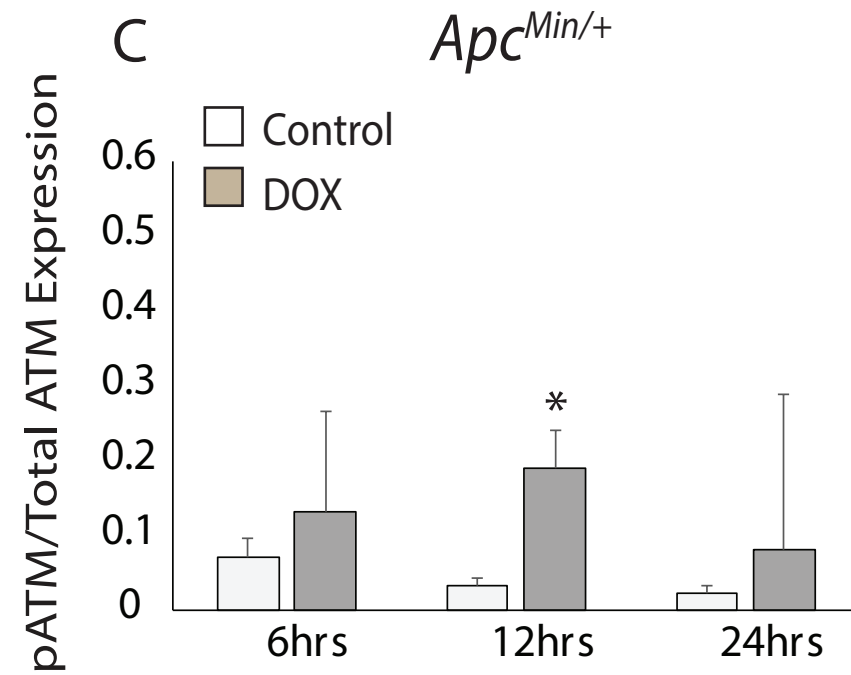

Supplement: mmc3.pdf [file mmc3.pdf]
